# Supplementary material
Source: publisher site journal article supplement (https://www.dovepress.com/article/418730)
Supplement: Supplementary file 1 [file get_supplementary_file.php]

**Table S1.** Safety summary of QP001

| SOC/PT | Grade 1 | | Grade 2 | | Grade 3 | | Grade 4 | | Grade 5 | |
| --- | --- | --- | --- | --- | --- | --- | --- | --- | --- | --- |
| Events | Subjects (%) | Events | Subjects (%) | Events | Subjects (%) | Events | Subjects (%) | Events | Subjects (%) |
| **Investigations** | 6 | 4(13.3) | 1 | 1(3.3) | 0 | 0(0.0) | 0 | 0(0.0) | 0 | 0(0.0) |
| Alanine aminotransferase increased | 1 | 1(3.3) | 0 | 0(0.0) | 0 | 0(0.0) | 0 | 0(0.0) | 0 | 0(0.0) |
| Aspartate aminotransferase increased | 1 | 1(3.3) | 0 | 0(0.0) | 0 | 0(0.0) | 0 | 0(0.0) | 0 | 0(0.0) |
| Blood bilirubin increased | 2 | 2(6.7) | 0 | 0(0.0) | 0 | 0(0.0) | 0 | 0(0.0) | 0 | 0(0.0) |
| Blood creatinine increased | 1 | 1(3.3) | 1 | 1(3.3) | 0 | 0(0.0) | 0 | 0(0.0) | 0 | 0(0.0) |
| Platelet count increased | 1 | 1(3.3) | 0 | 0(0.0) | 0 | 0(0.0) | 0 | 0(0.0) | 0 | 0(0.0) |
| **Nervous system disorders** | 1 | 1(3.3) | 0 | 0(0.0) | 0 | 0(0.0) | 0 | 0(0.0) | 0 | 0(0.0) |
| Lethargy | 1 | 1(3.3) | 0 | 0(0.0) | 0 | 0(0.0) | 0 | 0(0.0) | 0 | 0(0.0) |
| **General disorders and administration site conditions** | 2 | 2(6.7) | 0 | 0(0.0) | 0 | 0(0.0) | 0 | 0(0.0) | 0 | 0(0.0) |
| Injection site pain | 2 | 2(6.7) | 0 | 0(0.0) | 0 | 0(0.0) | 0 | 0(0.0) | 0 | 0(0.0) |
| **Total** | 9 | 6(20.0) | 1 | 1(3.3) | 0 | 0(0.0) | 0 | 0(0.0) | 0 | 0(0.0) |

Abbreviations: SOC, system organ class; PT, preferred term.

**Table S2.** Pharmacokinetic parameters of QP001 and MobicⓇ after 15mg single-dose

| PK parameters | 15 mg (N=10) QP001 | 15 mg (N=10) MobicⓇ | *P* value |
| --- | --- | --- | --- |
| Cmax (μg/mL) | 5.82 ± 1.33 | 1.79 ± 0.52 | < 0.01 |
| Tmax (h) | 0.03 (0.02, 0.17) | 4 (2, 10) | < 0.01 |
| AUC0-t (μg∙h/mL) | 58.08 ± 13.95 | 49.37 ± 11.57 | 0.15 |
| AUC0-∞ (μg∙h/mL) | 60.13 ± 14.91 | 51.66 ± 12.51 | 0.19 |
| λz (h-1) | 0.04 ± 0.01 | 0.04 ± 0.01 | 1.00 |
| t1/2 (h) | 18.77 ± 3.66 | 19.54 ± 3.36 | 0.63 |
| Vz (L) (Vz/F) | 6.94 ± 1.49 | 8.40 ± 1.55 | 0.05 |
| CL (mL·h-1) | 262.92 ± 61.49 | 304.25 ± 66.38 | 0.17 |
| MRT0-t (h) | 21.28 ± 3.76 | 25.82 ± 3.52 | 0.01 |
| MRT0-∞ (h) | 24.50 ± 5.18 | 29.95 ± 5.18 | 0.03 |
| F (%) | 116.85 ± 14.14 | | |

Note: All values are the mean ± SD, except Tmax which is median (range)

F=AUC0-∞.iv/AUC0-∞.po

Abbreviations: PK, pharmacokinetic; Cmax, maximum observed plasma concentration; Tmax, time to maximum plasma concentration; AUC0-t, area under the plasma concentration time curve from zero to t; AUC0-∞, area under the plasma concentration time curve from zero to infinity; λz, elimination rate constant; t1/2, terminal elimination half-life; Vz, apparent volume of distribution; CL, apparent clearance; MRT0-t, Average dwell time from 0 to t; MRT0-∞, Average dwell time from 0 to infinity.

**Table S3.** Analysis of dose proportionality in the range of 15-60 mg (model parameters)

| PK parameter | Linear regression equation | Slope (Beta) | 90% CI |
| --- | --- | --- | --- |
| lnCmax | lnCmax = 0.90*lnDose + (7.12E-15) | 0.90 | 0.77, 1.04 |
| lnAUC0-t | lnAUC0-t = 0.93*lnDose + (8.68E-15) | 0.93 | 0.81, 1.05 |
| lnAUC0-∞ | lnAUC0-∞ = 0.92*lnDose + (2.25E-15) | 0.92 | 0.80, 1.05 |

Abbreviations: PK, pharmacokinetic; Cmax, maximum observed plasma concentration; AUC0-t, area under the plasma

concentration time curve from zero to t; AUC0-∞, area under the plasma concentration time curve from zero to infinity.

**Table S4.** Pharmacokinetic parameters in males and females administered single-dose QP001 or MobicⓇ

| Group | PK parameter | Mean (SD) | | *P* value |
| --- | --- | --- | --- | --- |
| Female | Male |
| 15 mg MobicⓇ | Cmax (μg/mL) | 2.00 ± 0.65 | 1.58 ± 0.26 | 0.22 |
| Tmax (h) | 4.00 (4.00~7.00) | 4.00 (2.00~10.00) | 0.56 |
| AUC0-t (μg∙h/mL) | 54.85 ± 12.98 | 43.90 ± 7.61 | 0.14 |
| AUC0-∞ (μg∙h/mL) | 57.59 ± 14.03 | 45.72 ± 8.21 | 0.14 |
| λz (h-1) | 0.03 ± 0.01 | 0.04 ± 0.01 | 0.44 |
| t1/2 (h) | 20.36 ± 2.94 | 18.72 ± 3.88 | 0.21 |
| Vz (L) | 7.87 ± 1.51 | 8.92 ± 1.58 | 0.31 |
| CL (mL·h-1) | 271.76 ± 59.35 | 336.74 ± 61.27 | 0.13 |
| MRT0-t (h) | 26.36 ± 3.44 | 25.28 ± 3.92 | 0.66 |
| MRT0-∞ (h) | 30.94 ± 5.19 | 28.97 ± 5.58 | 0.58 |
| 15 mg QP001 | Cmax (μg/mL) | 6.12 ± 1.17 | 5.51 ± 1.53 | 1.00 |
| Tmax (h) | 0.03 (0.02~0.17) | 0.03 (0.03~0.17) | 0.41 |
| AUC0-t (μg∙h/mL) | 65.6 ± 15.8 | 50.60 ± 7.03 | 0.09 |
| AUC0-∞ (μg∙h/mL) | 68.0 ± 17.1 | 52.26 ± 7.36 | 0.10 |
| λz (h-1) | 0.04 ± 0.01 | 0.04 ±0.01 | 1.00 |
| t1/2 (h) | 18.93 ± 3.98 | 18.61 ±3.77 | 0.90 |
| Vz (L) | 6.17 ± 1.32 | 7.72 ± 1.34 | 0.10 |
| CL (mL·h-1) | 233.80 ± 66.34 | 292.04 ± 44.56 | 0.14 |
| MRT0-t (h) | 21.38 ± 4.03 | 21.17 ± 3.94 | 1.00 |
| MRT0-∞ (h) | 24.71 ± 5.61 | 24.29 ± 5.36 | 0.91 |
| 30 mg QP001 | Cmax (μg/mL) | 9.42 ± 1.19 | 9.26 ± 2.96 | 0.92 |
| Tmax (h) | 0.03 (0.02~0.08) | 0.03 (0.03~0.08) | 0.82 |
| AUC0-t (μg∙h/mL) | 111.70 ± 29.48 | 91.30 ± 29.05 | 0.30 |
| AUC0-∞ (μg∙h/mL) | 114.58 ± 31.39 | 94.26 ± 32.47 | 0.34 |
| λz (h-1) | 0.04 ± 0.01 | 0.04 ± 0.01 | 0.73 |
| t1/2 (h) | 16.79 ± 3.14 | 17.73 ± 4.27 | 0.70 |
| Vz (L) | 6.47 ± 0.62 | 8.47 ± 1.66 | 0.04* |
| CL (mL·h-1) | 278.68 ± 79.05 | 345.58 ± 100.44 | 0.28 |
| MRT0-t (h) | 20.37 ± 3.95 | 20.78 ± 3.79 | 0.87 |
| MRT0-∞ (h) | 22.59 ± 5.05 | 23.40 ± 6.35 | 0.83 |
| 60 mg QP001 | Cmax (μg/mL) | 20.24 ± 2.90 | 15.08 ± 2.16 | 0.01* |
| Tmax (h) | 0.03 (0.02~0.08) | 0.02 (0.02~0.08) | 0.74 |
| AUC0-t (μg∙h/mL) | 268.74 ± 44.99 | 233.59 ± 39.44 | 0.20 |
| AUC0-∞ (μg∙h/mL) | 281.72 ± 52.94 | 247.29 ± 39.44 | 0.28 |
| λz (h-1) | 0.03 ± 0.01 | 0.03 ± 0.00 | 0.34 |
| t1/2 (h) | 21.25 ± 3.54 | 22.97 ± 2.52 | 0.40 |
| Vz (L) | 6.56 ± 0.33 | 8.14 ± 1.14 | 0.03* |
| CL (mL·h-1) | 219.01 ± 40.35 | 247.63 ± 39.38 | 0.29 |
| MRT0-t (h) | 23.69 ± 2.75 | 24.90 ± 1.55 | 0.42 |
| MRT0-∞ (h) | 28.17 ± 4.85 | 30.55 ± 3.30 | 0.39 |

Note: *Significant difference between males and females, p < 0.05;All values are expressed as mean ± SD except tmax values, which are median (range).

Abbreviations: PK, pharmacokinetic; Cmax, maximum observed plasma concentration; Tmax, time to maximum plasma concentration; AUC0-t, area under the plasma concentration time curve from zero to t; AUC0-∞, area under the plasma concentration time curve from zero to infinity; λz, elimination rate constant; t1/2, terminal elimination half-life; Vz, apparent volume of distribution; CL, apparent clearance; MRT0-t, average dwell time from 0 to t; MRT0-∞, average dwell time from 0 to infinity.

**

Figure S1.** Box plot for QP001 trough plasma concentration in multiple-dose group on day 10, 11 and 12

Note: # p > 0.05 between groups, using a F-test.
